# Supplementary material for: Diatom-Bacteria Interactions Modulate the Composition and Productivity of Benthic Diatom Biofilms
Source: Front Microbiol. 2019 Jun 5;10:1255. doi: 10.3389/fmicb.2019.01255 (PMC6561236; doi:10.3389/fmicb.2019.01255)
Supplement: TABLE S2 — Composition of the mock community. The raw fastq data of the mock is available at NCBI Sequence Read Archive under the accession number SUB5539877. Briefly, the DNA was extracted and amplified for each strain individually and equimolar pooled afterward. The collection number refers to the identifier of the strains in the BCCM/LMG collection (http://bccm.belspo.be/about-us/bccm-lmg; LMG) or the research collection of the Laboratory of Microbiology Ugent (http://lmg.ugent.be; R). [file Table_2.xlsx]

## Sheet: Sheet1
Genus	species	collection number
Arthrobacter		R36537
Arthrobacter		R36671
Bacillus		R43903
Brevundimonas		R36741
Deinococcus		R36593
Deinococcus		R36590
Deinococcus		R36206
Devosia		R43424
Flavobacterium	aquatile	LMG4008
Flavobacterium	micromati	R36963
Gillisia		R39531
Herbasprillum		R36369
Hymnobacter		R36591
Loktanella	salsilacus	R8904
Paenibacillus	wynnii	LMG22176
Polaromonas		R39156
Porphyrobacter		R39130
Psychroflexus		R39535
Rhodococcus	fascians	R37549
Rothia		R36663
Staphylococcus	warneri	R36520
